# Supplementary material for: Tidal variability in the Hong Kong region
Source: Copernicus journal article supplement (doi:10.5194/os-15-853-2019), 2019-07-04
Supplement: Supplementary file 1 [file os-15-853-2019-supplement.pdf]

Supplement of Ocean Sci., 15, 853–864, 2019  
<https://doi.org/10.5194/os-15-853-2019-supplement>  
© Author(s) 2019. This work is distributed under  
the Creative Commons Attribution 4.0 License.

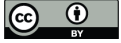

*Supplement of*

## **Tidal variability in the Hong Kong region**

**Adam T. Devlin et al.**

*Correspondence to:* Jiayi Pan (panj@cuhk.edu.hk)

The copyright of individual parts of the supplement might differ from the CC BY 4.0 License.

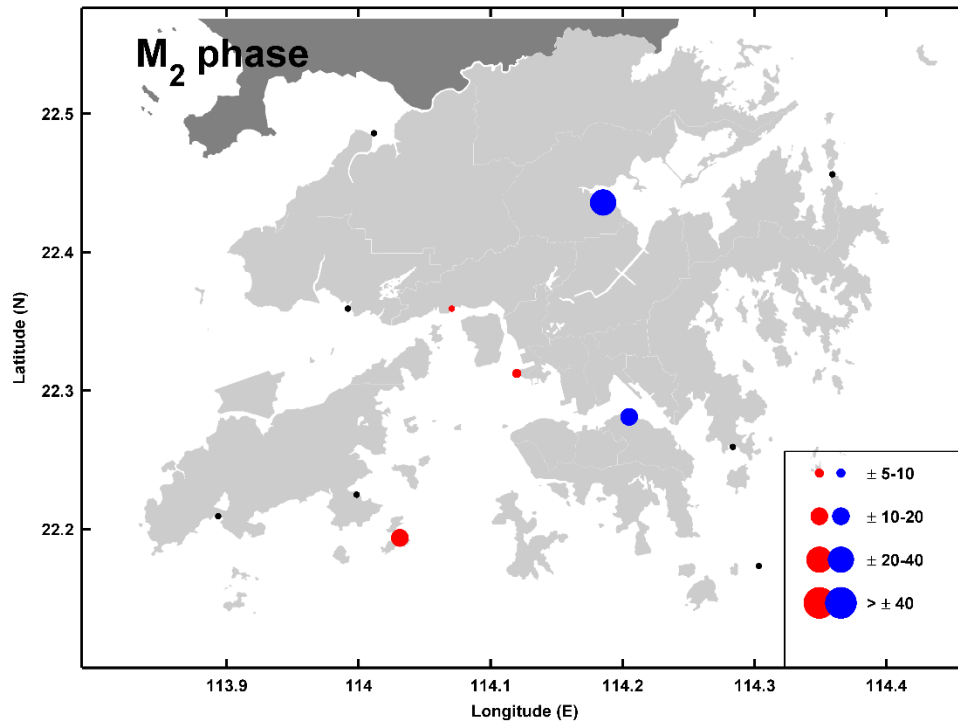

**Figure S1** Semidiurnal tidal anomaly correlations (TACs) of detrended  $M_2$  phase to detrended MSL in Hong Kong, with the marker size showing the relative magnitude according to the legend, in units of  $\text{deg m}^{-1}$ . Red/blue markers indicate positive/negative TACs, and black markers indicate TACs which are not significantly different from zero.

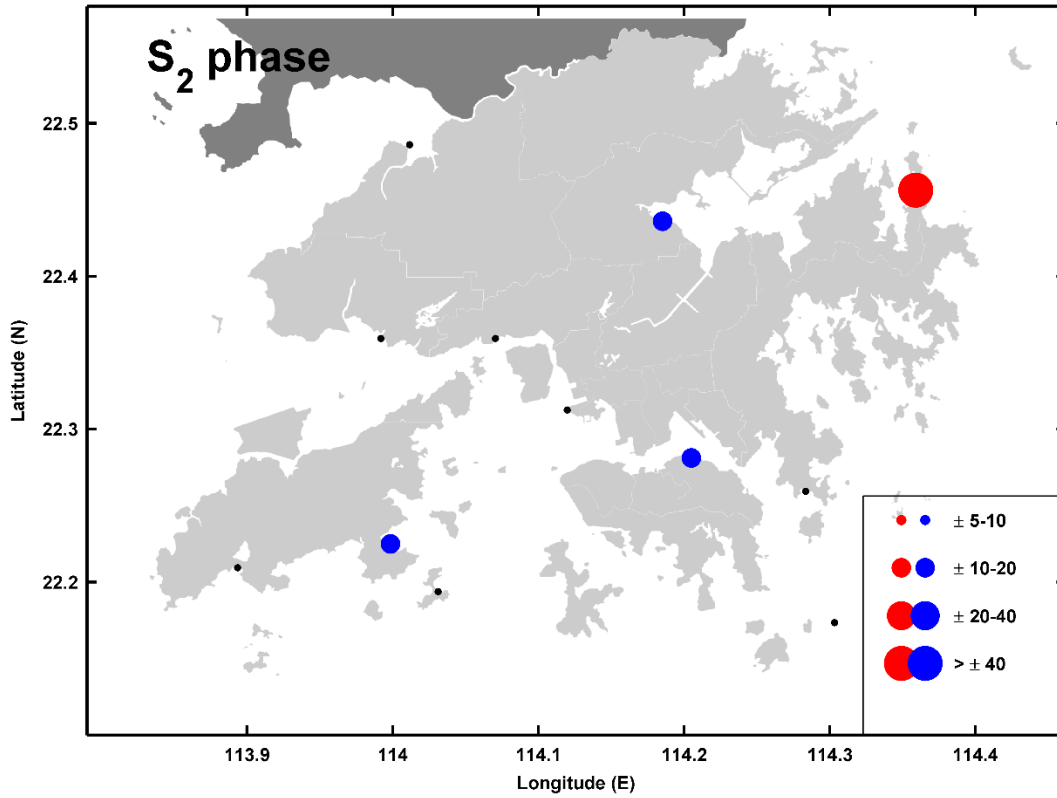

**Figure S2** Semidiurnal tidal anomaly correlations (TACs) of detrended S<sub>2</sub> phase to detrended MSL in Hong Kong, with the marker size showing the relative magnitude according to the legend, in units of deg m<sup>-1</sup>. Red/blue markers indicate positive/negative TACs, and black markers indicate TACs which are not significantly different from zero.

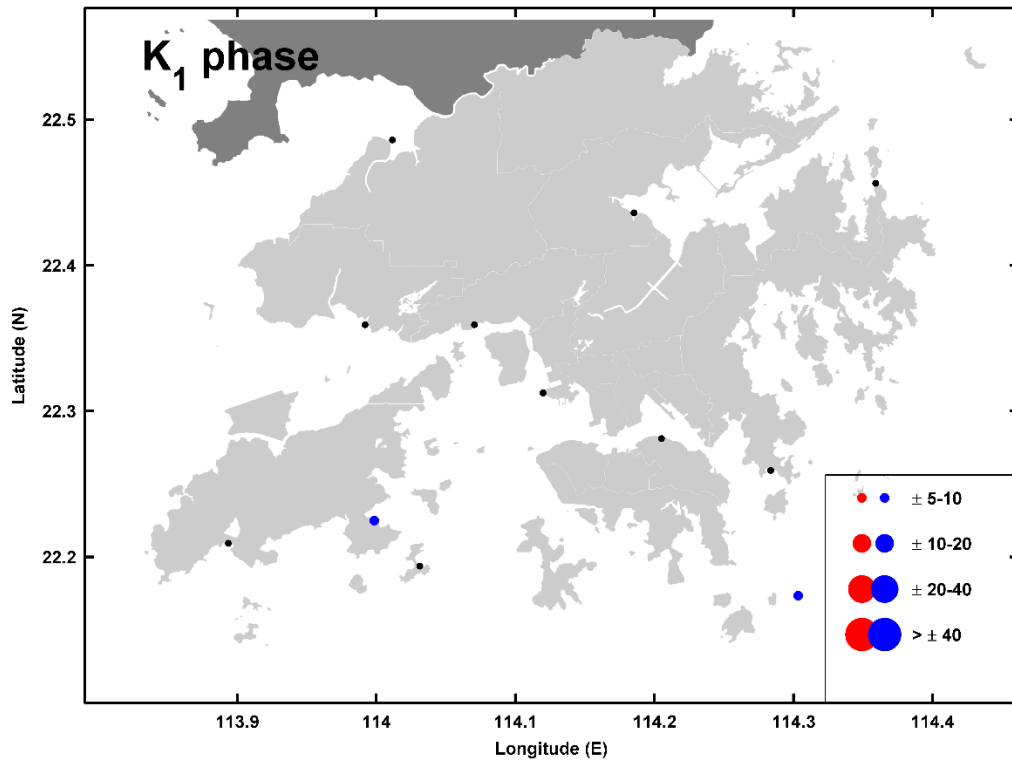

**Figure S3** Diurnal tidal anomaly correlations (TACs) of detrended  $K_1$  phase to detrended MSL in Hong Kong, with the marker size showing the relative magnitude according to the legend, in units of  $\text{deg m}^{-1}$ . Red/blue markers indicate positive/negative TACs, and black markers indicate TACs which are not significantly different from zero.

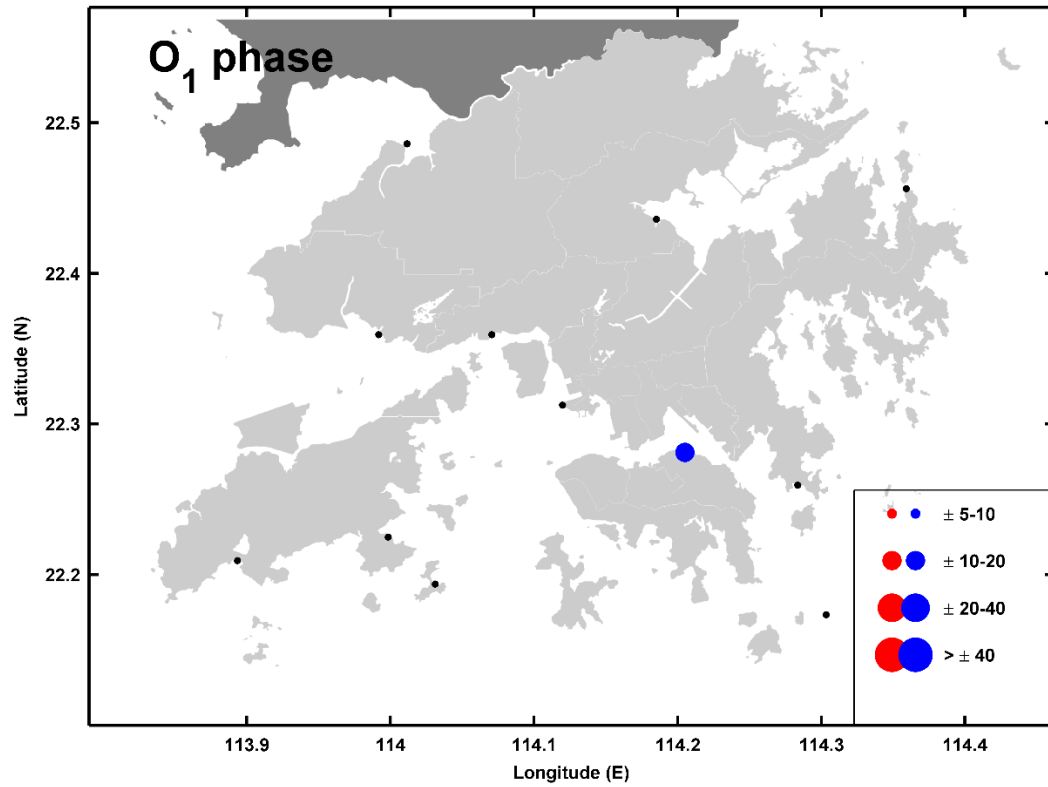

**Figure S4** Diurnal tidal anomaly correlations (TACs) of detrended O<sub>1</sub> phase to detrended MSL in Hong Kong, with the marker size showing the relative magnitude according to the legend, in units of deg m<sup>-1</sup>. Red/blue markers indicate positive/negative TACs, and black markers indicate TACs which are not significantly different from zero.

**Table S1** Phase TACs for M<sub>2</sub>, S<sub>2</sub>, K<sub>1</sub>, and O<sub>1</sub>. All values given are in units of degree change in the tidal phase for a 1-meter fluctuation in sea-level (deg m<sup>-1</sup>). Statistically significant values are given in bold italic text.

| <i>Station</i>             | <b>M<sub>2</sub> TAC</b> | <b>S<sub>2</sub> TAC</b> | <b>K<sub>1</sub> TAC</b> | <b>O<sub>1</sub> TAC</b> |
|----------------------------|--------------------------|--------------------------|--------------------------|--------------------------|
| <i>Quarry Bay (QB)</i>     | <b>-15 ± 2</b>           | <b>-17 ± 5</b>           | -4 ± 2                   | <b>-11 ± 1</b>           |
| <i>Tai Po Kau (TPK)</i>    | <b>-28 ± 6</b>           | <b>-18 ± 3</b>           | -6 ± 4                   | -13 ± 4                  |
| <i>Tsim Bei Tusi (TBT)</i> | +19 ± 13                 | +19 ± 17                 | +6 ± 5                   | +5 ± 4                   |
| <i>Chi Ma Wan (CMW)</i>    | -5 ± 5                   | <b>-16 ± 2</b>           | <b>-7 ± 4</b>            | -3 ± 1                   |
| <i>Cheung Chau (CHC)</i>   | <b>+13 ± 2</b>           | +23 ± 15                 | +39 ± 36                 | +1 ± 13                  |
| <i>Lok On Pai (LOP)</i>    | -2 ± 4                   | -15 ± 9                  | +1 ± 6                   | +3 ± 6                   |
| <i>Ma Wan (MW)</i>         | <b>+9 ± 2</b>            | +9 ± 8                   | +2 ± 13                  | -4 ± 5                   |
| <i>Tai Miu Wan (TMW)</i>   | +4 ± 8                   | +2 ± 9                   | +1 ± 7                   | +2 ± 3                   |
| <i>Shek Pik (SP)</i>       | -11 ± 6                  | -10 ± 12                 | -6 ± 6                   | +12 ± 2                  |
| <i>Waglan Island (WAG)</i> | -40 ± 30                 | +12 ± 2                  | <b>+6 ± 1</b>            | +4 ± 3                   |
| <i>Ko Lau Wan (KLW)</i>    | +7 ± 3                   | <b>+43 ± 22</b>          | +10 ± 15                 | -3 ± 5                   |
| <i>Kwai Chung (KC)</i>     | <b>+8 ± 2</b>            | +45 ± 20                 | +29 ± 52                 | -9 ± 23                  |
